# Supplementary material
Source: PubMed Central journal article supplement (PMC5628796)
Supplement: mmc1.pdf [file mmc1.pdf]

YMTHE, Volume 25

## **Supplemental Information**

### **Treatment with Recombinant Human MG53 Protein Increases Membrane Integrity in a Mouse Model of Limb Girdle Muscular Dystrophy 2B**

**Liubov V. Gushchina, Sayak Bhattacharya, Kevin E. McElhanon, Jin Hyuk Choi, Heather Manring, Eric X Beck, Jenna Alloush, and Noah Weisleder**

**Supplemental Information for Gushchina, et al.**

**Supplementary Table S1. Statistical analysis of histological features of muscular dystrophy in *Dysf*<sup>-/-</sup> mice.**

| Skeletal Muscle               | <i>P</i> value<br>(3 vs 6 months) | <i>P</i> value<br>(3 vs 10-12 months) | <i>P</i> value<br>(3 vs 15-16 months) | <i>P</i> value<br>(6 vs 10-12 months) | <i>P</i> value<br>(6 vs 15-16 months) | <i>P</i> value<br>(10-12 vs 15-16 months) |
|-------------------------------|-----------------------------------|---------------------------------------|---------------------------------------|---------------------------------------|---------------------------------------|-------------------------------------------|
| <b>Histopathological area</b> |                                   |                                       |                                       |                                       |                                       |                                           |
| Gluteus                       | n/s                               | 0.0019                                | <0.0001                               | 0.0069                                | 0.0002                                | n/s                                       |
| Gastroc                       | n/s                               | n/s                                   | 0.0021                                | n/s                                   | 0.0027                                | 0.0003                                    |
| <b>Central Nuclei</b>         |                                   |                                       |                                       |                                       |                                       |                                           |
| Gluteus                       | n/s                               | <0.0001                               | <0.0001                               | <0.0001                               | <0.0001                               | n/s                                       |
| Gastroc                       | n/s                               | n/s                                   | <0.0001                               | n/s                                   | <0.0001                               | <0.0001                                   |

n/s – measurements are not significantly different

*P* values are calculated by *Tukey-ANOVA* method using Prism software (GraphPad Prism 7.0, USA).

**Supplementary Table S2. Statistical analysis of *ex vivo* studies of rhMG53 efficacy on whole FDB muscle derived from *Dysf*<sup>-/-</sup> mice.**

|            | <i>P</i> value<br>(Dysf KO,<br>Saline,<br>2 mM<br>Ca <sup>2+</sup> ) | <i>P</i> value<br>(Dysf KO,<br>BSA,<br>0 mM<br>Ca <sup>2+</sup> ) | <i>P</i> value<br>(Dysf KO,<br>BSA,<br>2 mM<br>Ca <sup>2+</sup> ) | <i>P</i> value<br>(Dysf KO,<br>rhMG53,<br>0 mM<br>Ca <sup>2+</sup> ) | <i>P</i> value<br>(Dysf KO,<br>rhMG53,<br>2 mM<br>Ca <sup>2+</sup> ) | <i>P</i> value<br>(WT<br>0 mM<br>Ca <sup>2+</sup> ) |
|------------|----------------------------------------------------------------------|-------------------------------------------------------------------|-------------------------------------------------------------------|----------------------------------------------------------------------|----------------------------------------------------------------------|-----------------------------------------------------|
| <b>AUC</b> |                                                                      |                                                                   |                                                                   |                                                                      |                                                                      |                                                     |
| Dysf KO,   | <0.0001                                                              | <0.0001                                                           | <0.0001                                                           | n/s                                                                  | n/s                                                                  | n/s                                                 |

|                                                 |         |         |         |         |         |         |
|-------------------------------------------------|---------|---------|---------|---------|---------|---------|
| rhMG53,<br>0 mM<br>Ca <sup>2+</sup>             |         |         |         |         |         |         |
| Dysf KO,<br>rhMG53,<br>2 mM<br>Ca <sup>2+</sup> | <0.0001 | <0.0001 | <0.0001 | n/s     | n/s     | n/s     |
| WT<br>0 mM<br>Ca <sup>2+</sup>                  | 0.0006  | n/s     | n/s     | <0.0001 | <0.0001 | n/s     |
| WT<br>2 mM<br>Ca <sup>2+</sup>                  | <0.0001 | <0.0001 | <0.0001 | n/s     | n/s     | <0.0001 |
| <b>MaxFluor FM4-64</b>                          |         |         |         |         |         |         |
| Dysf KO,<br>rhMG53,<br>0 mM<br>Ca <sup>2+</sup> | <0.0001 | <0.0001 | <0.0001 | n/s     | n/s     | n/s     |
| Dysf KO,<br>rhMG53,<br>2 mM<br>Ca <sup>2+</sup> | <0.0001 | <0.0001 | <0.0001 | n/s     | n/s     | n/s     |
| WT<br>0 mM<br>Ca <sup>2+</sup>                  | n/s     | n/s     | n/s     | <0.0001 | <0.0001 | n/s     |
| WT<br>2 mM<br>Ca <sup>2+</sup>                  | <0.0001 | <0.0001 | <0.0001 | n/s     | n/s     | <0.0001 |

n/s – measurements are not significantly different

*P* values are calculated by *Tukey-ANOVA* method using Prism software (GraphPad Prism 7.0, USA).

**Supplementary Table S3.** Effect of serum CK and LDH release in *Dysf*<sup>-/-</sup> mice after treatment and downhill running exercise.

|                                                | CK level (IU/L) | LDH level (IU*10 <sup>3</sup> /L) |
|------------------------------------------------|-----------------|-----------------------------------|
| <b>WT (C57BL/6J)</b>                           | 17.7 ± 4.6      | 55.0 ± 3.2                        |
| <b>Dysf<sup>-/-</sup> Sedentary (control)</b>  | 58.5 ± 6.4      | 76.5 ± 3.2                        |
| <b>Dysf<sup>-/-</sup> Pre-exercise-Saline</b>  | 67.6 ± 6.7      | 88.7 ± 5.6                        |
| <b>Dysf<sup>-/-</sup> Post-exercise-Saline</b> | 157.5 ± 14.8    | 148.9 ± 15.4                      |
| <b>Dysf<sup>-/-</sup> Pre-exercise-rhMG53</b>  | 67.0 ± 9.8      | 74.5 ± 11.4                       |
| <b>Dysf<sup>-/-</sup> Post-exercise-rhMG53</b> | 123.0 ± 8.0     | 120.1 ± 12.1                      |

**Supplementary Table S4.** Quantification analysis of IgG positive fibers from *Dysf*<sup>-/-</sup> mice.

| Muscle         | Control*   | Post-exercise-Saline* | Post-exercise-rhMG53* |
|----------------|------------|-----------------------|-----------------------|
| <b>Gluteus</b> | 7.9 ± 1.4  | 17.7 ± 1.8            | 13.1 ± 1.4            |
| <b>EDL</b>     | 24.3 ± 1.1 | 29.8 ± 1.3            | 26.3 ± 1.0            |
| <b>Soleus</b>  | 11.6 ± 1.3 | 18.5 ± 1.1            | 13.5 ± 0.8            |

\*The quantification result was expressed as the mean of positive fibers to the total number of fibers ratio, expressed as a percentage.

**Supplementary Table S5.** Absorption spectroscopy analysis of EBD-injected *Dyst<sup>-/-</sup>* mice after treatment and downhill running exercise.

| <b>Muscle</b>    | <b>Control*</b> | <b>Post-exercise-Saline*</b> | <b>Post-exercise-rhMG53*</b> |
|------------------|-----------------|------------------------------|------------------------------|
| <b>Gluteus</b>   | 2.5 ± 0.13      | 3.2 ± 0.12                   | 2.9 ± 0.14                   |
| <b>Soleus</b>    | 5.2 ± 0.17      | 6.0 ± 0.29                   | 5.3 ± 0.21                   |
| <b>EDL</b>       | 2.5 ± 0.15      | 3.4 ± 0.19                   | 2.7 ± 0.10                   |
| <b>TA</b>        | 1.7 ± 0.09      | 2.4 ± 0.17                   | 2.2 ± 0.06                   |
| <b>Gastroc</b>   | 2.0 ± 0.10      | 2.6 ± 0.14                   | 2.4 ± 0.05                   |
| <b>FDB</b>       | 5.5 ± 0.59      | 5.4 ± 0.48                   | 5.5 ± 0.62                   |
| <b>Diaphragm</b> | 8.2 ± 0.18      | 8.4 ± 0.21                   | 8.5 ± 0.26                   |
| <b>Kidney</b>    | 11.4 ± 0.40     | 13.7 ± 0.48                  | 13.5 ± 0.43                  |

\*The absorption results of EBD uptake were expressed as the mean of OD<sup>(620-800)</sup>/tissue (g).
